# Supplementary material
Source: PubMed Central journal article supplement (PMC5909664)
Supplement: nox181_suppl_supplementary-materials-sheng-rebuttal.pdf [file nox181_suppl_supplementary-materials-sheng-rebuttal.pdf]

Supplementary Materials

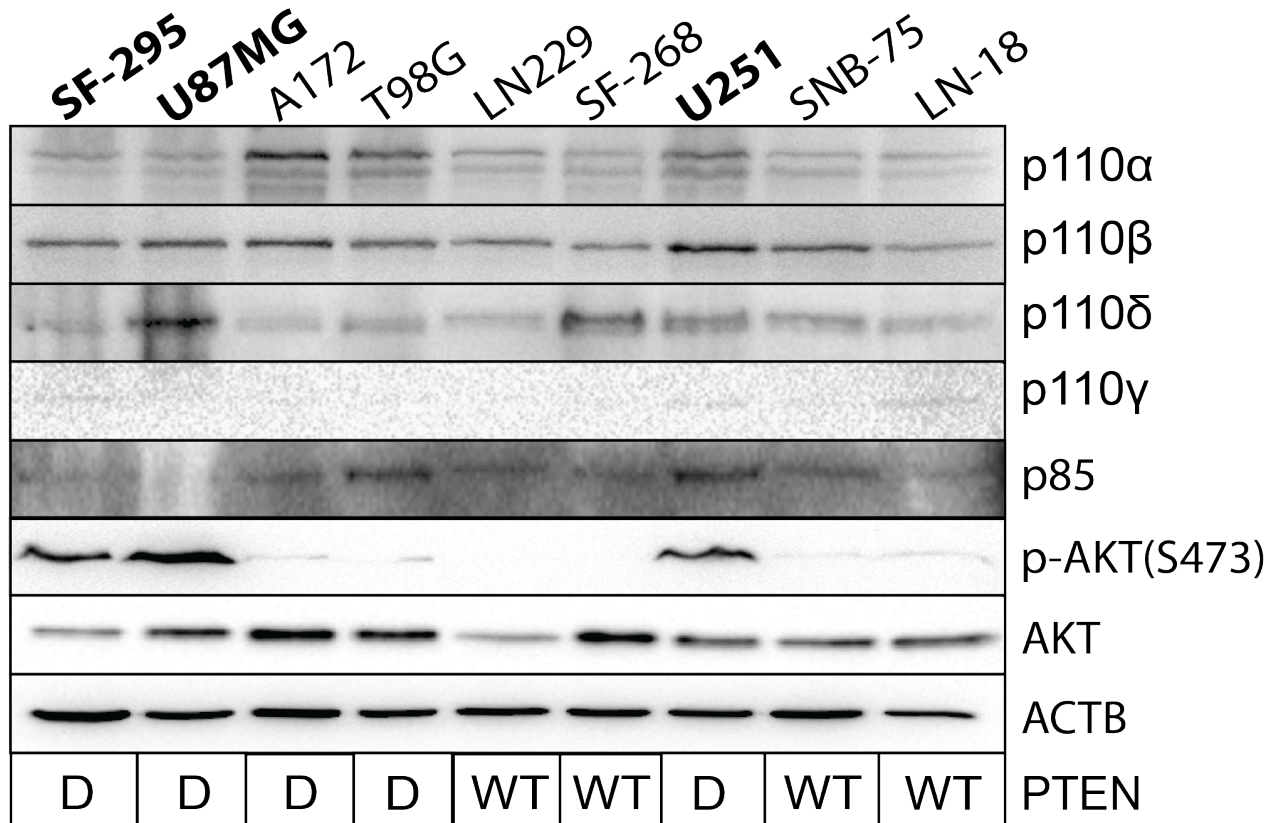

**Fig. S1. Immunoblotting of PI3K and AKT proteins in GBM cell lines.** This is one set of experiments shown in **Fig. 3B**. The intensities of each protein were quantified using Image J. PTEN status in each cell line determined by previous studies is shown. D: deficient; WT: wild type. Deficient PTEN is defined as either PTEN gene deletion or inactivating PTEN mutations.

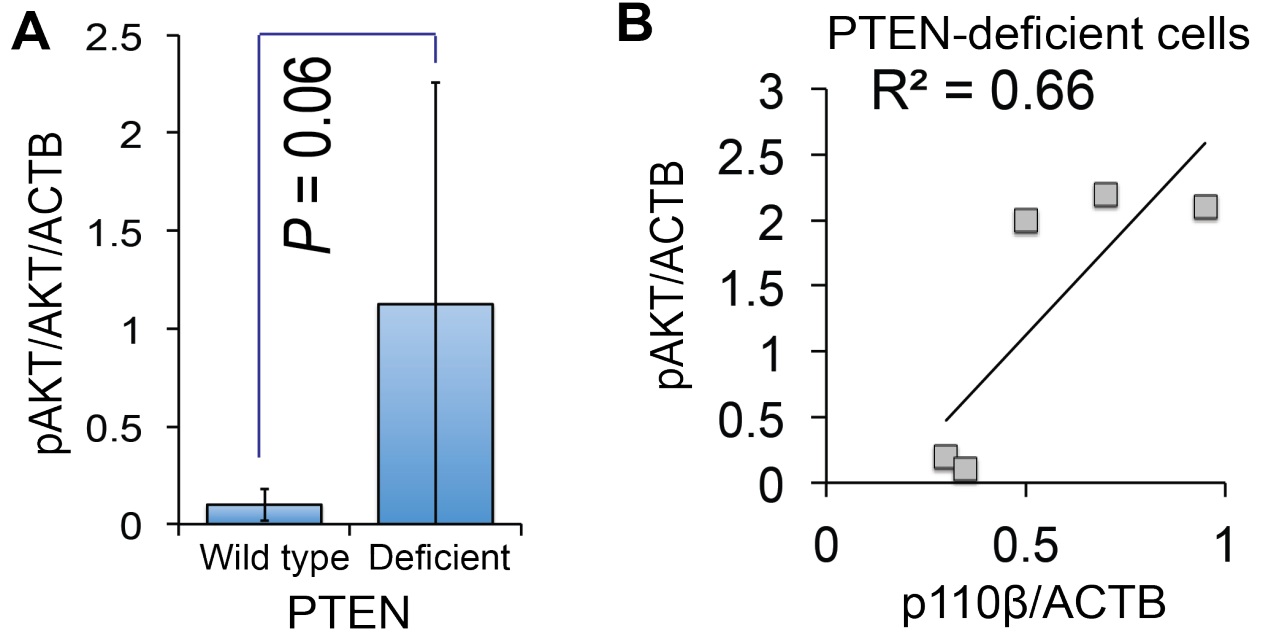

**Fig. S2. PTEN and p110β/pAKT in GBM cell lines.** To explore the relationship of PTEN and p110β/pAKT, nine GBM cell lines were divided into two groups: PTEN-wild type and PTEN-deficient, based on data shown in **Figure S1**. The means of intensities of pAKT/ACTB (A) in each group were plotted. Correlation of pAKT/ACTB and p110β/ACTB in PTEN-deficient GBM cell lines were determined using a linear regression model and *t*-test was used to determine the difference between means of two groups (B). R square refers to the correlation between two measurements. Compared to results in all GBM cell lines ( $R^2 = 0.79$ ; **Fig. 3B**), the correlation of p110β and pAKT decreased in PTEN-deficient GBM cells.

### A U251

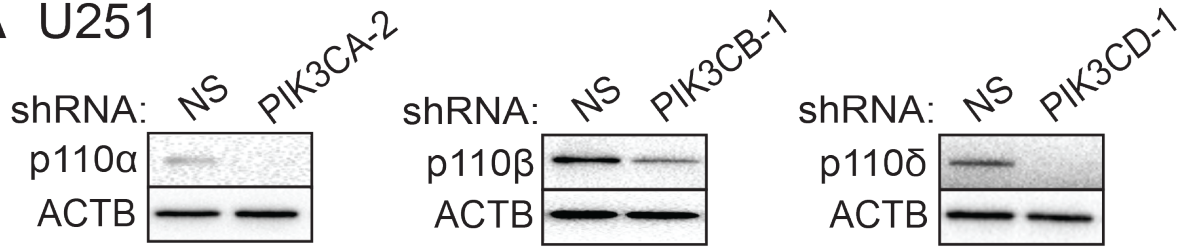

### B SF-295

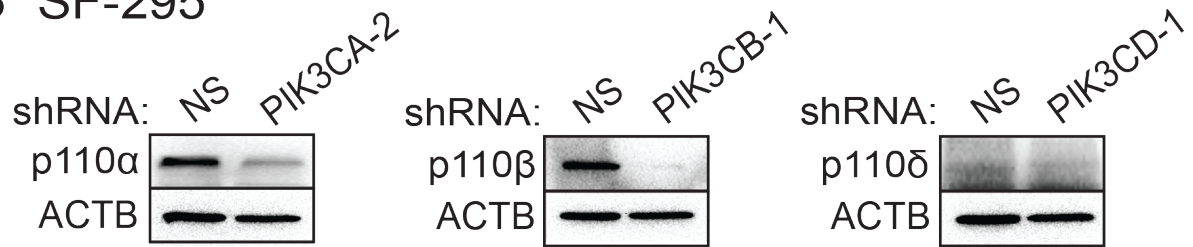

### C LN229

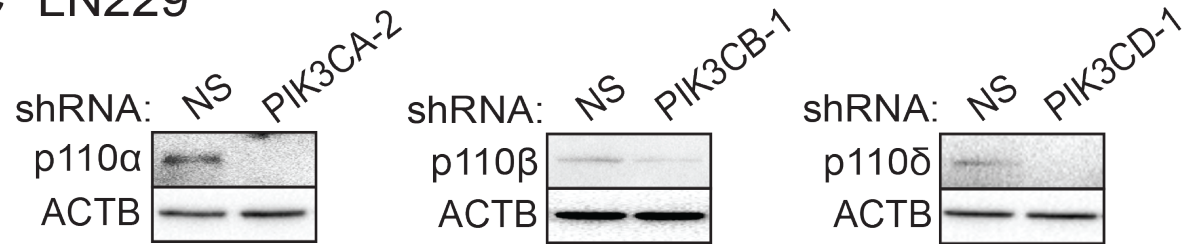

**Fig. S3. Knockdown of p110 proteins in GBM cell lines.** GBM cells were transduced with viruses of NS shRNA or shRNAs of PIK3CA, PIK3CB, or PIK3CD or transfected with plasmids encoding above shRNAs. Levels of p110 $\alpha$ , p110 $\beta$ , and p110 $\delta$  were determined in U251 (A), SF-295 (B), and LN229 (C) cells using immunoblotting.  $\beta$ -actin (ACTB) is the loading control.

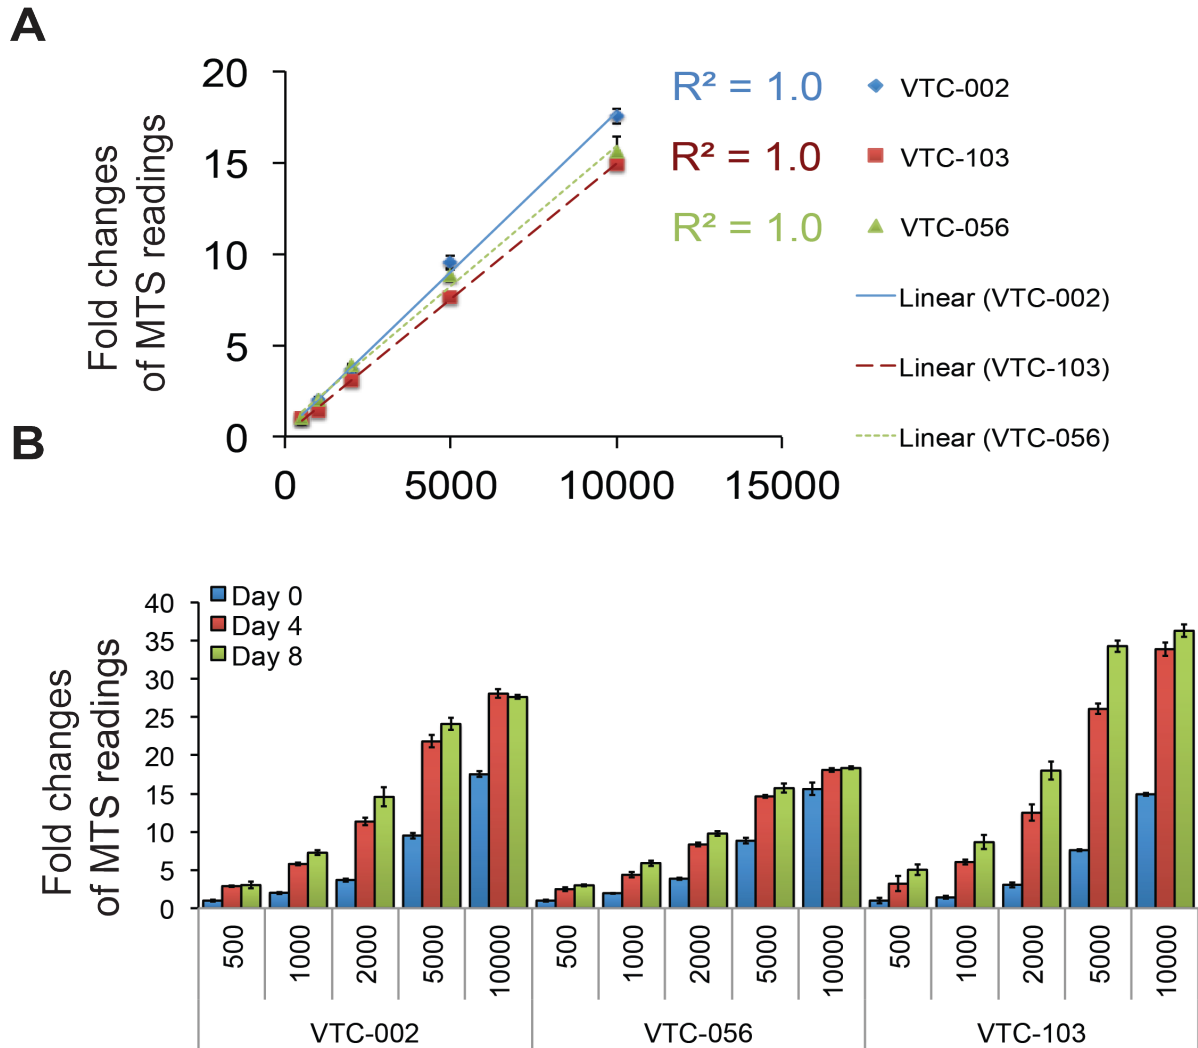

**Fig. S4. Growth rates of primary GBM cells expressing high or low levels of p110 $\beta$ .** (A) Correlation of MTS readings and cell numbers. The cell numbers of p110 $\beta$ -high VTC-002 and VTC-103 cells and p110 $\beta$ -low VTC-056 cells were determined using the Trypan blue exclusion assay. Cells at different densities were plated in a 96-well plate and immediately analyzed using the MTS assay. The MTS readings were plotted against cell numbers. R squares were determined by linear regression analysis. (B) Growth curves of GBM primary cells. VTC-002, VTC-056, and VTC-103 cells were plated at different cell densities. Cells were then incubated in culture media for 0, 4, and 8 days. Cell numbers were determined using the MTS assay. Fold changes of MTS readings are shown. At all cell densities tested, p110 $\beta$ -high VTC-002 and VTC-103 cells divided faster than p110 $\beta$ -low VTC-056 cells. At high cell densities, the growth of VTC-056 cells was halted, whereas VTC-002 and VTC-103 continued to propagate.

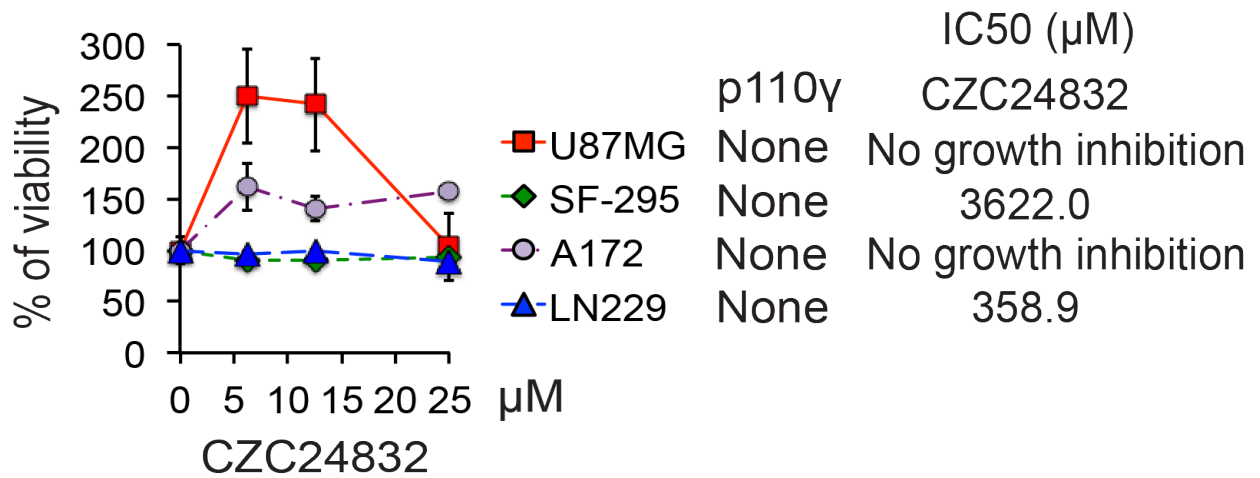

**Fig. S5. Cytotoxicity of p110γ inhibitor CZC24832 to GBM cell lines.** Four GBM cell lines were treated with CZC24832 at various doses for 4 days. Cell viability was determined using the MTS assay. Levels of p110γ and IC50s of CZC24832 in different cells are shown. CZC24832 showed a growth promotion in U87MG and A172 cells; hence, IC50s were undetectable.

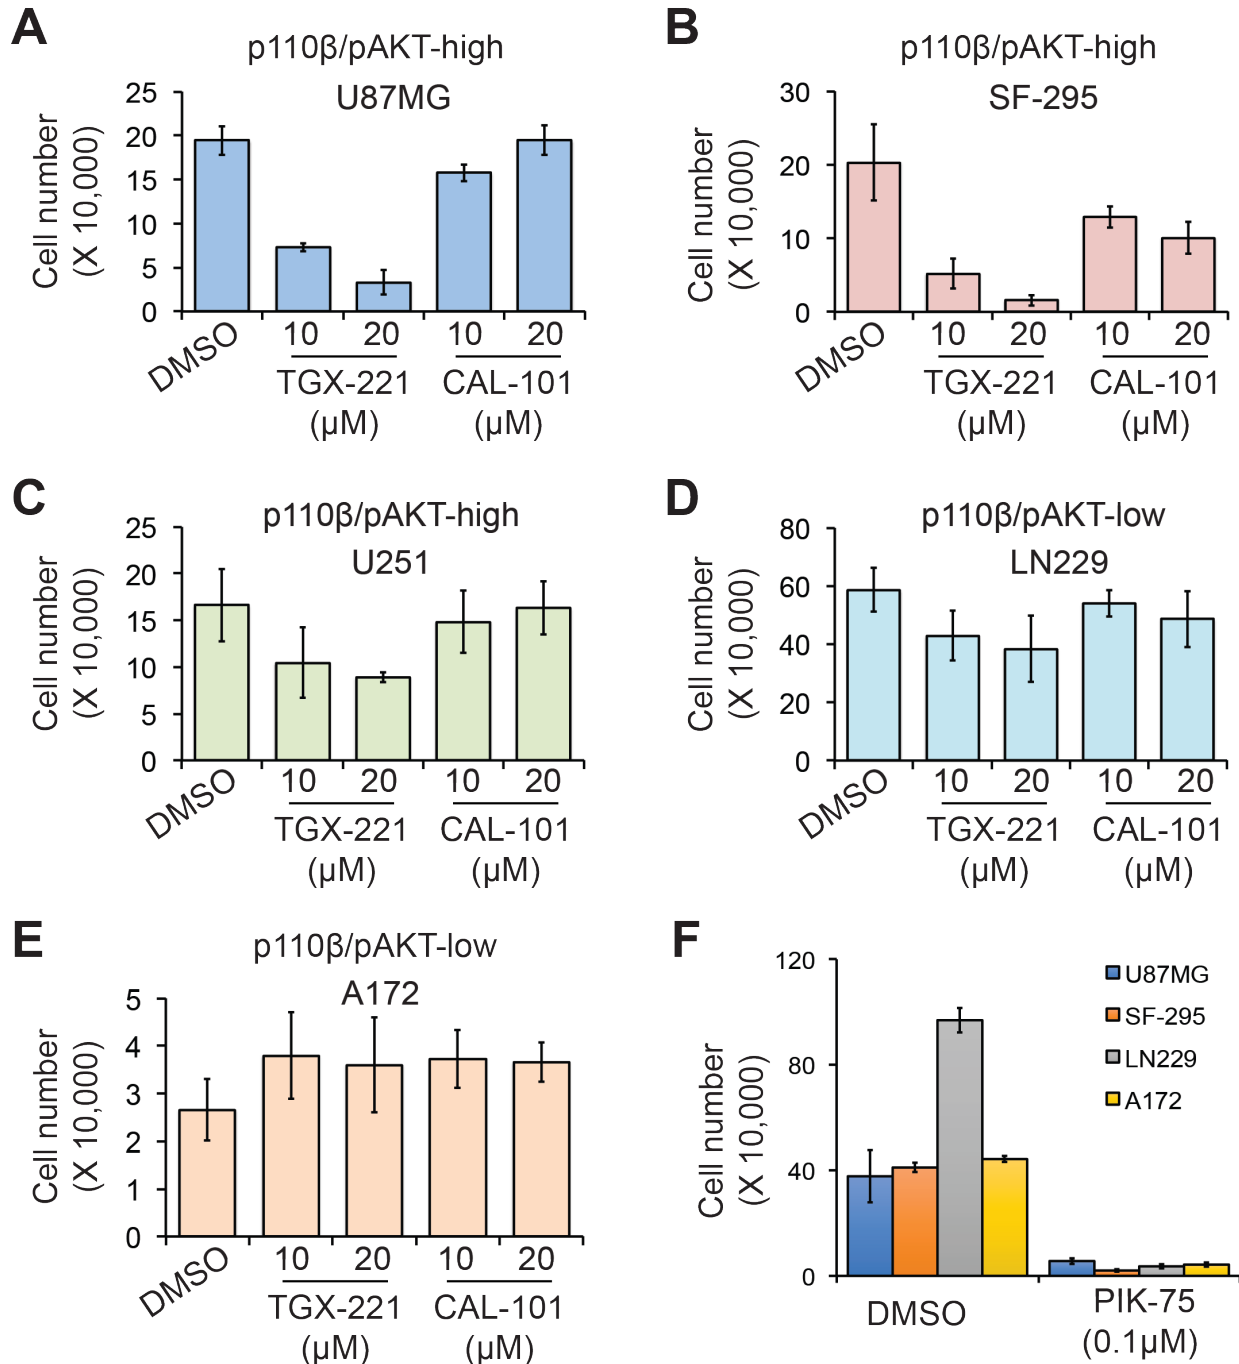

**Fig. S6. Trypan blue exclusion assay in GBM cell lines treated with PI3K isoform-selective inhibitors.** GBM cell lines U87MG (A), SF-295 (B), U251 (C), LN229 (D), and A172 (E) with different levels of p110 $\beta$  were seeded at 1 to 5 x 10<sup>4</sup> cells per well in a 12-well plate. Cells were then treated with DMSO (vehicle control), TGX-221 (10 or 20  $\mu$ M) or CAL-101 (10 or 20  $\mu$ M) for 4 days. Single cells were suspended in culture media and counted using the Trypan blue exclusion assay. The numbers of live cells are shown. (F) PIK-75-treated GBM cells. U87MG, SF-295, LN229 and A172 cells were treated with DMSO or 0.1  $\mu$ M PIK-75. Live cells were counted as described above. Results shown in this figure are consistent with those in Figure 5.

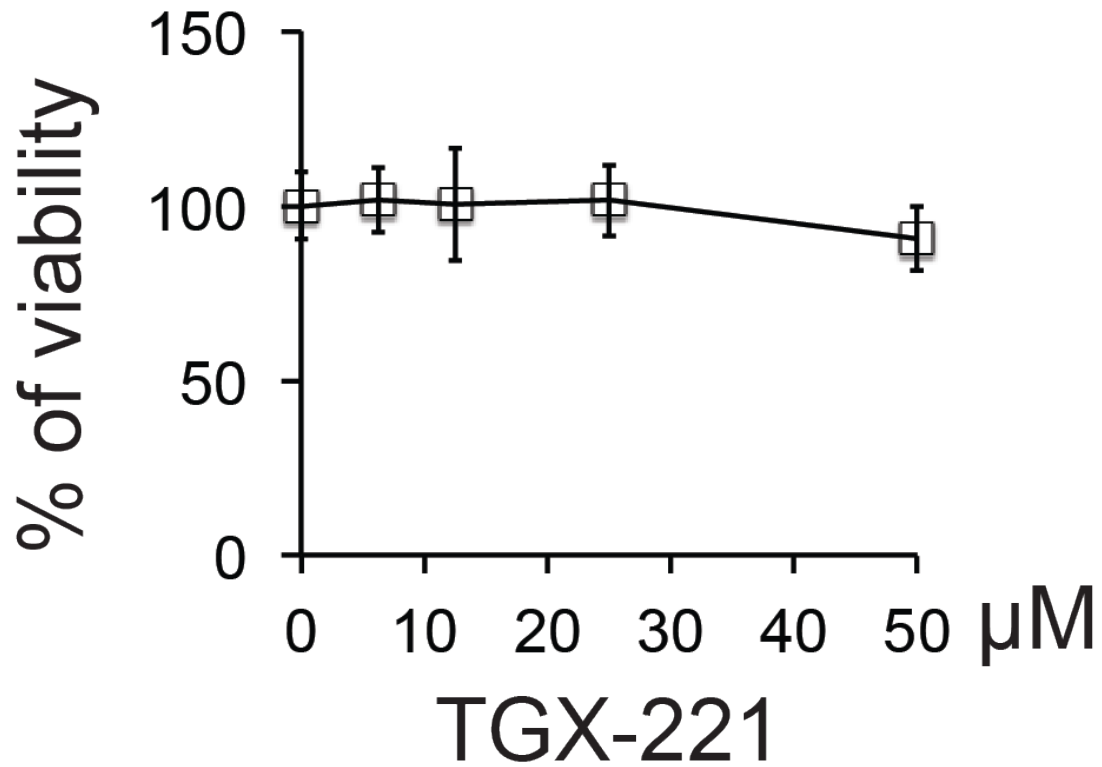

**Fig. S7. The effect of TGX-221 on the growth of VTC-034/GSCs.** p110 $\beta$ -high/pAKT-low/pGSK3 $\beta$ -low VTC-034/GSCs were treated with TGX-221 at different doses ranging from 0 to 50  $\mu\text{M}$ . Cell viability was determined by the MTS assay. TGX-221 did not significantly inhibit the growth of VTC-034/GSCs.

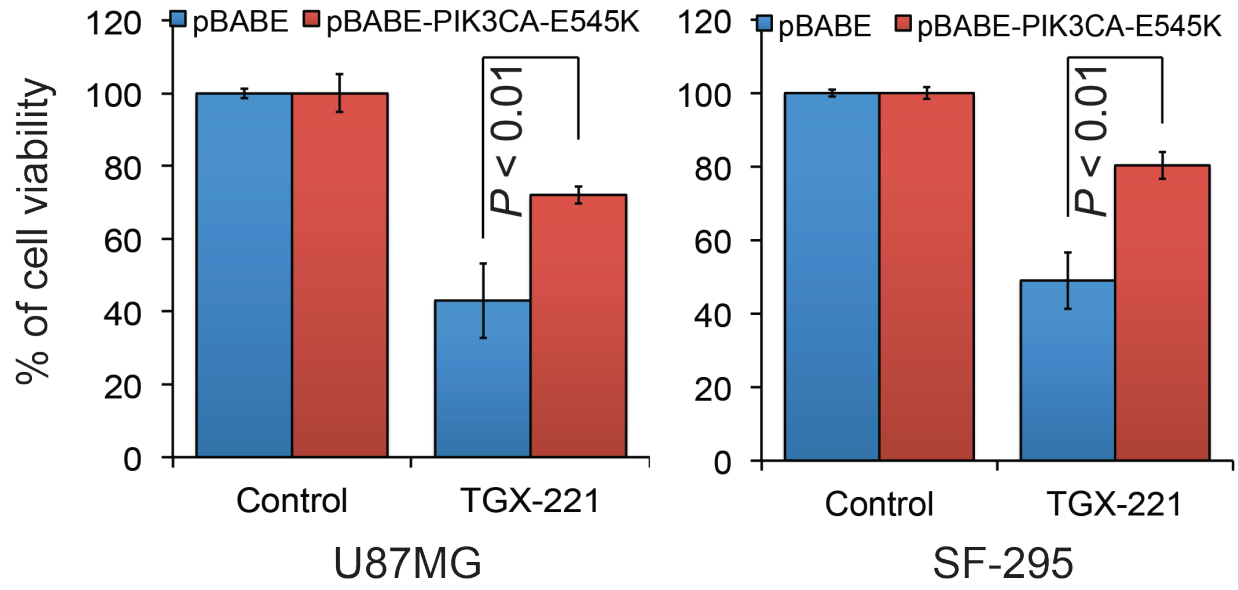

**Fig. S8. The effect of a constitutively active PIK3CA mutant on TGX-221-induced growth inhibition in p110 $\beta$ -high U87MG and SF-295 cells.** U87MG and SF-295 cells were transiently transfected with pBABE (empty vector) or pBABE-PIK3CA-E545K that encodes a mutant PIK3CA that constitutively activates AKT. Cells were then treated with 25  $\mu$ M TGX-221 for 4 days. Cell viability was determined by the MTS assay. Student t test was used to determine the difference between two groups.



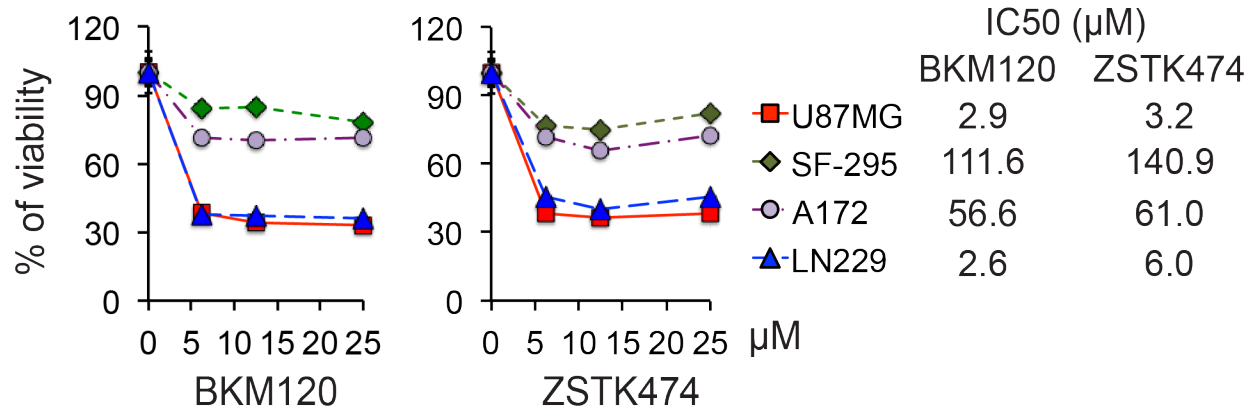

**Fig. S9. Cytotoxicity of pan PI3K inhibitors to GBM cell lines.** Four GBM cell lines were treated with pan PI3K inhibitors BKM120 or ZSTK474 at various doses for 4 days. Cell viability was determined using the MTS assay. IC50s are shown.

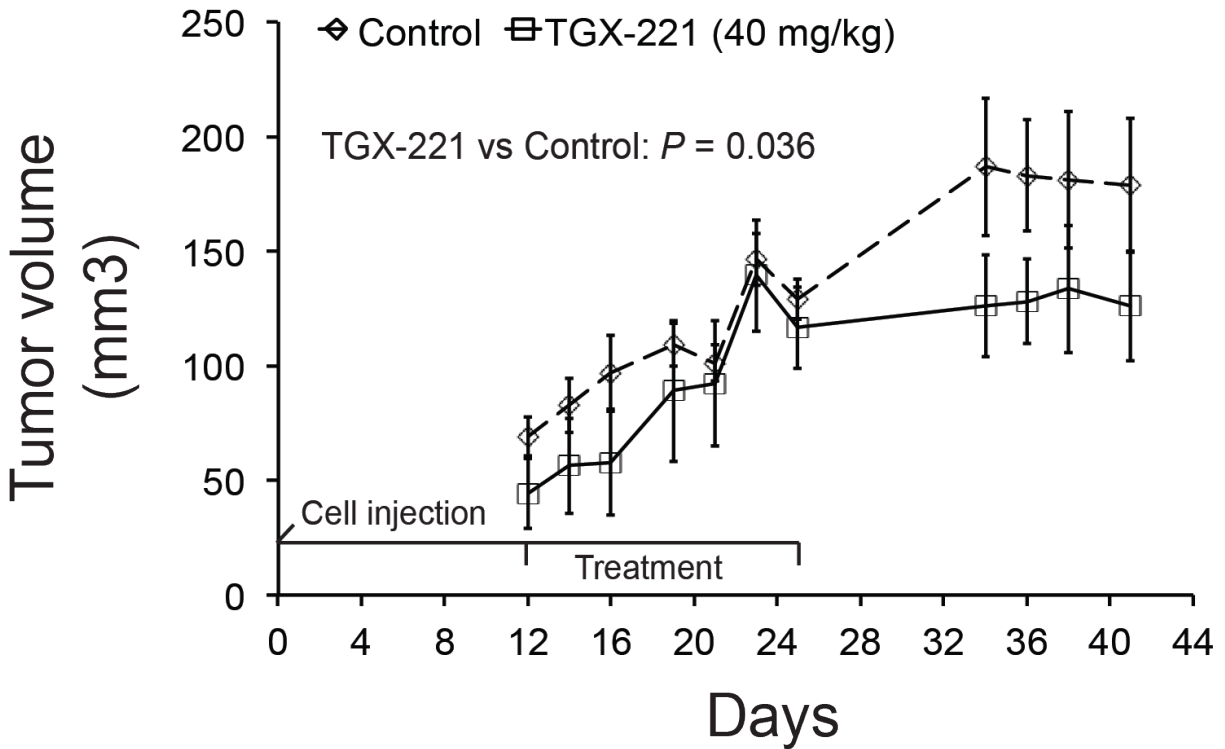

**Fig. S10. TGX-221 inhibits the growth of SF-295 tumors in mice.**  $10^6$  SF-295 cells were subcutaneously injected into the mice. 12 days after injection, mice were treated with TGX-221 (40 mg/kg) daily through intraperitoneal injection. Treatment duration time was 14 days. Tumor sizes were measured every other day till 18 days after TGX-221 treatment. Student *t* test was used to determine the difference between two groups. Tumors in TGX-221 treatment group showed a significant growth retardation post drug treatment, compared to tumors in the control group.

**Table S1. Correlation of p110 $\beta$  and pAKT protein levels and survival of GBM patients.**

| <b>p110<math>\beta</math>/pAKT</b> | <b>Sample ID</b> | <b>Days to death</b> | <b>Average /SE</b> | <b><i>P</i> (<i>t</i>-test)</b> |
|------------------------------------|------------------|----------------------|--------------------|---------------------------------|
| Low                                | VTC-001          | 257                  | 263 $\pm$ 42.4     | <b>0.011</b>                    |
|                                    | VTC-004          | 392                  |                    |                                 |
|                                    | VTC-037          | 319                  |                    |                                 |
|                                    | VTC-056          | 181                  |                    |                                 |
|                                    | VTC-064          | 166                  |                    |                                 |
| High                               | VTC-084          | 46                   | 77 $\pm$ 29        |                                 |
|                                    | VTC-103          | 135                  |                    |                                 |
|                                    | VTC-061          | 50                   |                    |                                 |

Note: Based on protein levels of p110 $\beta$  and pAKT in primary cells (**Fig. 3A**), patients whose tumor specimens were analyzed were divided into two groups. Patient survival is determined by the average days to death. Student *t*-test was used to determine the difference between means of groups.

Table S2. IC50s of PI3K inhibitors in GBM cell lines.

| PI3K Inhibitors      | IC50s ( $\mu\text{M}$ ) |        |      |       |
|----------------------|-------------------------|--------|------|-------|
|                      | U87MG                   | SF-295 | A172 | LN229 |
| MLN1117( $\alpha$ )  | 62.8                    | 30.1   | 88.3 | 12.9  |
| HS173 ( $\alpha$ )   | 0.5                     | N/A    | 0.6  | N/A   |
| IC87114 ( $\delta$ ) | 9.4                     | N/A    | 11.6 | N/A   |
| PKI587 (PI3K/MTOR)   | 0.1                     | 0.2    | 0.3  | 0.1   |
| LY294002 (PI3K/MTOR) | 26.3                    | 14.3   | 19.9 | 11.7  |

Note: Low IC50s are highlighted in red. N/A: not available.

**Table S3. IC50s of PI3K inhibitors in astrocytes.**

| <b>PI3K Inhibitors</b> | <b>IC50s (<math>\mu</math>M) in astrocytes</b> |
|------------------------|------------------------------------------------|
| TGX221( $\beta$ )      | 100.4                                          |
| GSK2636771( $\beta$ )  | 291.0                                          |
| PIK-75( $\alpha$ )     | 0.1                                            |
| BYL719( $\alpha$ )     | 7.1                                            |
| MLN1117( $\alpha$ )    | 8.1                                            |
| HS173 ( $\alpha$ )     | 0.3                                            |
| CAL101( $\delta$ )     | 122.0                                          |
| PI3065( $\delta$ )     | 11.8                                           |
| IC87114 ( $\delta$ )   | 21.1                                           |
| CZC24832( $\gamma$ )   | 21.2                                           |
| BKM120(pan)            | 4.4                                            |
| ZSTK474(pan)           | 9.0                                            |
| PKI587 (PI3K/MTOR)     | 0.2                                            |
| LY294002 (PI3K/MTOR)   | 21.9                                           |

Note: IC50s were calculated based on the viability of cells treated with various doses of drugs for 4 days. Low IC50s are highlighted in red.
